# Supplementary material
Source: publisher site journal article supplement (https://www.degruyterbrill.com/publication/isbn/9783486718089/downloadAsset/9783486718089_Buchinformation.pdf)
Supplement: Supplementary file 1 [file 9783486718089_Buchinformation.pdf]

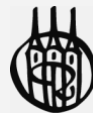

# Das Ende der Entspannungspolitik?

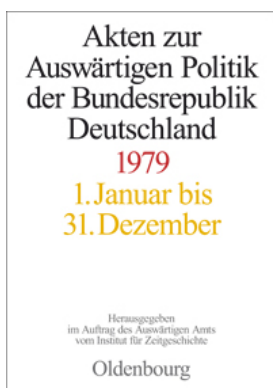

## Akten zur Auswärtigen Politik der Bundesrepublik Deutschland 1979

Herausgegeben im Auftrag des Auswärtigen Amts  
vom Institut für Zeitgeschichte  
Haupt Herausgeber: Horst Möller  
Mitherausgeber: Klaus Hildebrand und Gregor Schöllgen  
Wissenschaftliche Leiterin: Ilse Dorothee Pautsch  
Bearbeitet von Michael Ploetz und Tim Szatkowski

2010 | LXXXVIII, 2.128 S. | Leinen  
in 2 Teilbänden | € 138,00  
ISBN 978-3-486-59191-0

Bisher erschienen:

Jahresbände  
1949 bis 1953  
1963 bis 1978

In der Übersicht  
unter:

[www.oldenbourg-wissenschaftsverlag.de/aapd](http://www.oldenbourg-wissenschaftsverlag.de/aapd)

Das Jahr 1979 stand im Zeichen krisenhafter und den Weltfrieden bedrohender Entwicklungen: Im Februar übte China militärische Vergeltung für die Besetzung Kambodschas durch Vietnam. Die Revolution im Iran zwang den Schah ins Exil und ermöglichte die Rückkehr von Ayatollah Khomeini. Die Geiselnahme in der US-Botschaft in Teheran zeigte die Grenzen diplomatischer Bemühungen auf. Über die Umsetzung des Friedens von Camp David entbrannte im Nahen Osten eine heftige Kontroverse. Der sowjetische Einmarsch in Afghanistan am Jahresende belastete das Ost-West-Verhältnis. Auf dem Gebiet der Rüstungskontrolle wurde die Unterzeichnung des SALT-II-Vertrags begleitet von der weiteren Stationierung auf Westeuropa gerichteter sowjetischer Mittelstreckenraketen. Zusammen mit den USA warb Bonn für eine Strategie von Verhandlungen und Nachrüstung, die im NATO-Doppelbeschluss vom 12. Dezember ihren Ausdruck fand.

[oldenbourg.de](http://oldenbourg.de)

Rezensionsexemplare auf Anforderung:

**Pressereferat Geisteswissenschaften – Ulrike Staudinger**

Oldenbourg Wissenschaftsverlag | Rosenheimer Str. 145 | 81671 München

Tel.: +49 89 45051-211 | Fax: +49 89 45051-204 | [ulrike.staudinger@oldenbourg.de](mailto:ulrike.staudinger@oldenbourg.de)

Alle Veröffentlichungen des Oldenbourg Verlags sind über den Buchhandel zu beziehen.

Oldenbourg
